# Supplementary material
Source: HighWire-hosted journal article supplement (https://jech.bmj.com/content/74/2/173)
Supplement: inline-supplementary-material-1 [file inline-supplementary-material-1.pdf]

## Appendix A

ICD-9 and ICD-10 codes used for identification of developmental disability (disabilities include Autism Spectrum Disorder, Down syndrome, Fetal Alcohol Syndrome and Other developmental disabilities)

Table A1.

### *ICD-9 Codes for Developmental Disabilities*

| ICD-9 Number | Disorder                                                                                                                      |
|--------------|-------------------------------------------------------------------------------------------------------------------------------|
| 299          | Pervasive development disorders (e.g. autism)                                                                                 |
| 317          | Mild mental retardation                                                                                                       |
| 318          | Moderate severe and profound mental retardation                                                                               |
| 319          | Unspecified mental retardation                                                                                                |
| 7580-7583    | Chromosomal anomalies for which a developmental disability is typically present (e.g. Down syndrome, cri-du-chat syndrome)    |
| 7585         | Other conditions due to autosomal anomalies                                                                                   |
| 7588         | Other conditions due to chromosome anomalies                                                                                  |
| 7589         | Conditions due to anomaly of unspecified chromosome                                                                           |
| 7595         | Tuberous sclerosis                                                                                                            |
| 75981        | Other and unspecified congenital anomalies: Prader–Willi                                                                      |
| 75983        | Other and unspecified congenital anomalies: Fragile X                                                                         |
| 75989        | Other and unspecified congenital anomalies: other (e.g. Menkes disease, Laurence–Moon–Biedl, Rubinstein–Taybi syndrome, etc.) |
| 76071        | Foetal alcohol syndrome                                                                                                       |
| 76077        | Foetal hydantoin syndrome                                                                                                     |

Table A2.

*ICD-10 Codes for Developmental Disabilities*

| ICD-10 Number | Disorder                                                                                          |
|---------------|---------------------------------------------------------------------------------------------------|
| F700          | Mild mental retardation with the statement of no, or minimal, impairment of behavior              |
| F701          | Mild mental retardation, significant impairment of behaviour requiring attention or treatment     |
| F708          | Mild mental retardation, other impairments of behavior                                            |
| F709          | Mild mental retardation without mention of impairment of behavior                                 |
| F710          | Moderate mental retardation with the statement of no, or minimal, impairment of behavior          |
| F711          | Moderate mental retardation, significant impairment of behaviour requiring attention or treatment |
| F718          | Moderate mental retardation, other impairments of behavior                                        |
| F719          | Moderate mental retardation without mention of impairment of behavior                             |
| F720          | Severe mental retardation with the statement of no, or minimal, impairment of behavior            |
| F721          | Severe mental retardation, significant impairment of behaviour requiring attention or treatment   |
| F728          | Severe mental retardation, other impairments of behavior                                          |
| F729          | Severe mental retardation without mention of impairment of behavior                               |
| F730          | Profound mental retardation with the statement of no, or minimal, impairment of behavior          |
| F731          | Profound mental retardation, significant impairment of behaviour requiring attention or treatment |
| F738          | Profound mental retardation, other impairments of behavior                                        |
| F739          | Profound mental retardation without mention of impairment of behavior                             |

|         |                                                                                                      |
|---------|------------------------------------------------------------------------------------------------------|
| F780    | Other mental retardation with the statement of no, or minimal, impairment of behaviour               |
| F781    | Other mental retardation, significant impairment of behaviour requiring attention or treatment       |
| F788    | Other mental retardation, other impairments of behavior                                              |
| F789    | Other mental retardation without mention of impairment of behavior                                   |
| F790    | Unspecified mental retardation with the statement of no, or minimal, impairment of behavior          |
| F791    | Unspecified mental retardation, significant impairment of behaviour requiring attention or treatment |
| F798    | Unspecified mental retardation, other impairments of behavior                                        |
| F799    | Unspecified mental retardation without mention of impairment of behavior                             |
| F840    | Childhood autism                                                                                     |
| F841    | Atypical autism                                                                                      |
| F843    | Other childhood disintegrative disorder                                                              |
| F844    | Overactive disorder associated with mental retardation and stereotyped movements                     |
| F845    | Asperger's syndrome                                                                                  |
| F848    | Other pervasive developmental disorders                                                              |
| F849    | Pervasive developmental disorder, unspecified                                                        |
| Q851    | Tuberous sclerosis                                                                                   |
| Q860    | Foetal alcohol syndrome                                                                              |
| Q861    | Foetal hydantoin syndrome                                                                            |
| Q871    | Aarskog, Prader–Willi, de Lange, Seckel, etc.                                                        |
| Q8723** | Rubinstein–Taybi                                                                                     |

|            |                                                    |
|------------|----------------------------------------------------|
| Q8731**    | Sotos                                              |
| Q878       | Other                                              |
| Q90        | Down syndrome                                      |
| Q91 – Q939 | Chromosomal abnormalities not elsewhere classified |
| Q971       | Female with more than three chromosomes            |
| Q992       | Fragile X Syndrome                                 |
| Q998       | Other specified chromosomal abnormalities          |

## Appendix B

Table B1. *ICD Numbers for Depression*

| ICD Numbers | Disorder                                      |
|-------------|-----------------------------------------------|
| ICD-9       |                                               |
| 309         | Adjustment reaction                           |
| 311         | Depressive disorder, not elsewhere classified |
| 50B         | Anxiety/depression                            |
| ICD-10      |                                               |
| F32         | Depressive episode                            |
| F33         | Recurrent depressive episode                  |
| F34         | Persistent mood disorder                      |
| F38         | Other mood disorders                          |

Table B2. *ICD Numbers for Mental Health Problems*

| ICD Numbers            | Disorder                                                                              |
|------------------------|---------------------------------------------------------------------------------------|
| <b>ICD-9</b>           |                                                                                       |
| 291-293                | Psychotic conditions due to use of psychoactive substances                            |
| 295-298                | Other psychoses                                                                       |
| 300-308                | Neurotic disorders, personality disorders and other nonpsychotic mental disorders     |
| 312                    | Disturbance of conduct not elsewhere classified                                       |
| <b>ICD-10</b>          |                                                                                       |
| F10 – F19              | Mental and behavioural disorders due to use of psychoactive substances                |
| F20 – F25,<br>F28, F29 | Schizophrenia, schizotypal and delusional disorders                                   |
| F30                    | Manic episode                                                                         |
| F31                    | Bipolar affective disorder                                                            |
| F40 – F45,<br>F48      | Neurotic, stress-related and somatoform disorders                                     |
| F50 – F55,<br>F59      | Behavioural syndromes associated with physiological disturbances and physical factors |
| F60 – F66, F68,<br>F69 | Disorders of adult personality and behaviour                                          |
